# Supplementary material for: Thermal Stability of siRNA Modulates Aptamer- conjugated siRNA Inhibition
Source: PubMed Central journal article supplement — Mol Ther Nucleic Acids. 2012 Oct 16;1(10):e51–. doi: 10.1038/mtna.2012.41 (PMC3499696; doi:10.1038/mtna.2012.41), 2012-10-16

## 12-23-M-UCCC-no siRNA

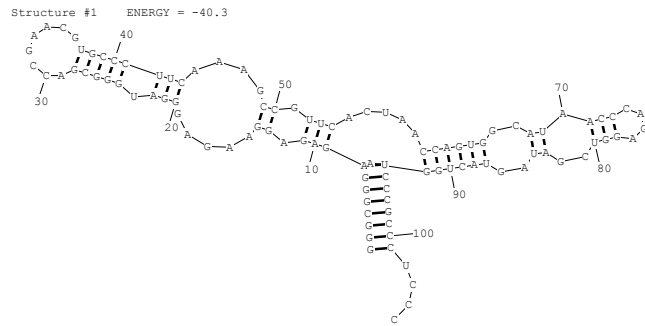

## OX40-no modifications

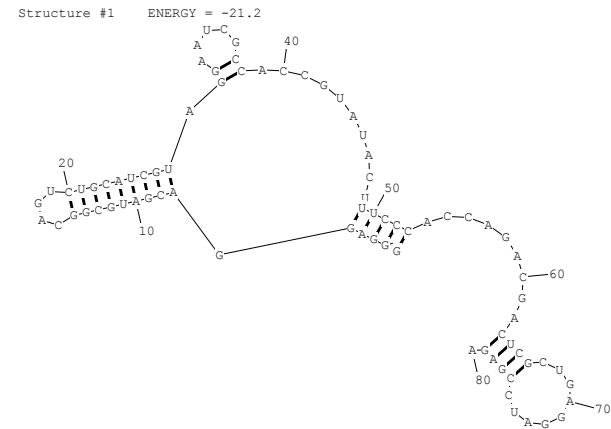

### List of siRNAs used

| New ID | Target gene | Target sequence      |
|--------|-------------|----------------------|
| 1      | TGFBRII     | CCAACAACAUAACCACAA   |
| 2      | TGFBRII     | UGGGAGAAGUGAAGAUUA   |
| 3      | TGFBRII     | GAGUACUCCUCUGGAAAA   |
| 4      | TGFBRII     | GGAGGAAGAACGACAAGAA  |
| 5      | TGFBRII     | GGGACCTCAAGAGCTCTAA  |
| 6      | TGFBRII     | CTAACATCCTAGTGAAGAA  |
| 7      | PRDM1       | GAGAGUACAGCGUGAAAAGA |
| 8      | EGFP        | CAAGCUGACCCUGAAGUUC  |
| 9      | PRDM1       | GGGACUCCUACUCCUACUU  |
| 10     | PRDM1       | GCCACCGUACGGCAUUAGU  |
| 11     | PRDM1       | GCCUCAUCCCAUGCUCAAU  |
| 12     | TBX21       | GCCAAAGGAUCCGGGAGA   |
| 13     | TBX21       | ACUAAGAGGAGGAGGAUUA  |
| 14     | TBX21       | GGGAGAACTTTGAGTCCAT  |
| 15     | TBX21       | CAGAGATCACTCAGCTGAA  |
| 16     | TBX21       | AGCTGAAAATCGACAACAA  |
| 17     | RNF111      | GGACCUUACUGUUGAUGAA  |
| 18     | RNF111      | CUGCCAAUGAAGAAUUAA   |
| 19     | RNF111      | GCACAUAUCCACAUAAUA   |
| 20     | SMAD-3      | CCAGAGCAAUAUCCAGAA   |
| 21     | SMAD-3      | GAAGGAUGAAGUGUGUGUA  |
| 22     | SMAD-3      | CCGUUUGAGCUUCGUCAAA  |
| 23     | Rptor       | CUCGGGAUCUCUCCAAAA   |
| 24     | Twist1      | GGACAAGCUGAGCAAGAUU  |
| 25     | CBLB        | GCCUGGAAUAUGUUAUAU   |
| 26     | Rptor       | GCCAGUGGGUGGCCAUUUG  |

# 12-23-M-UCCC-si#1-AS-UU/S-dTdT

Structure #1 ENERGY = -72.2 \_

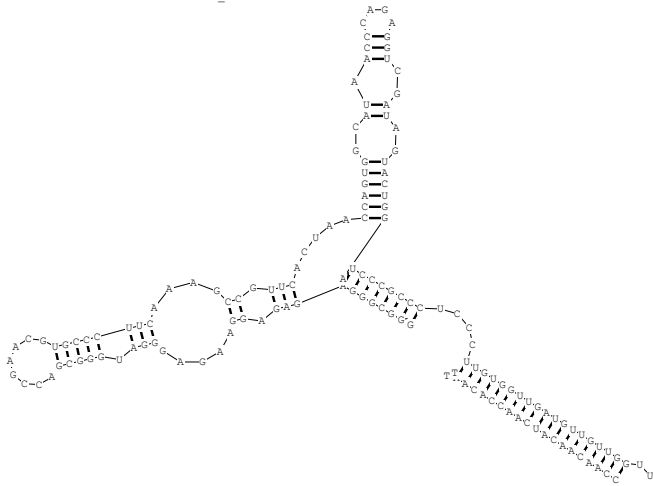

# 12-23-M-UCCC-si#1-S-BL/AS-dTdT

Structure #2 ENERGY = -71.8 \_

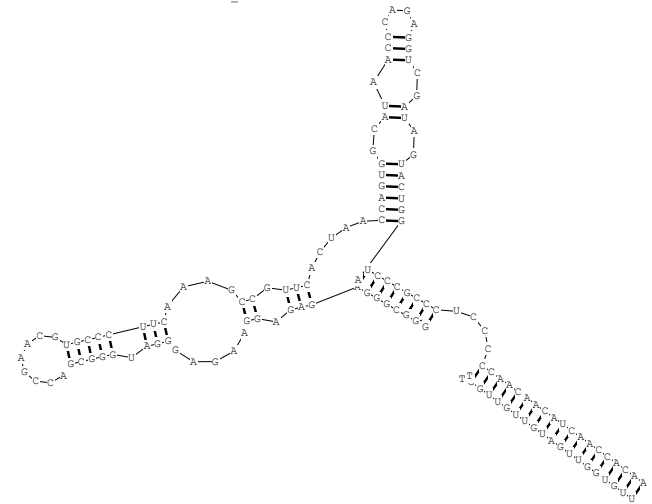

# 12-23-M-UCCC-si#2-AS-UU/S-dTdT

Structure #1 ENERGY = -73.9 \_

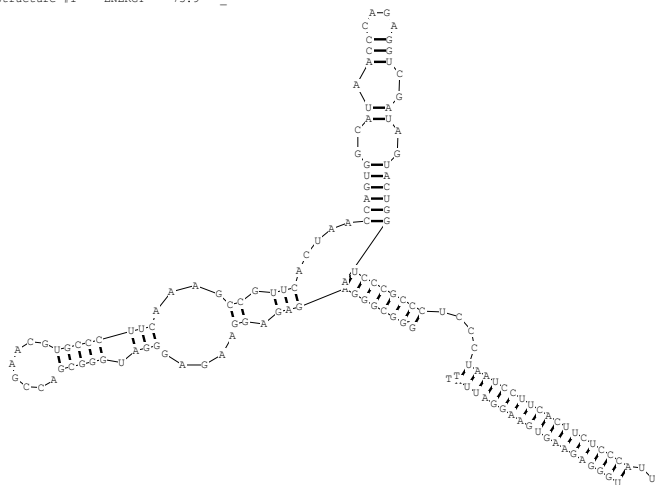

# 12-23-M-UCCC-si#2-S-BL/AS-dTdT

Structure #1 ENERGY = -73.3 \_

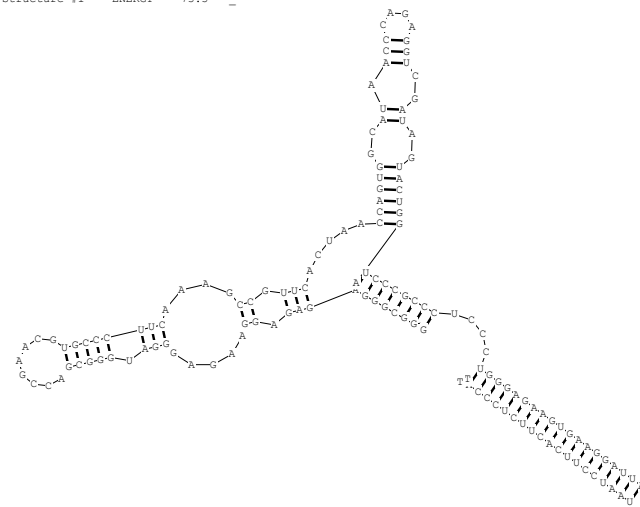



# 12-23-M-UCCC-si#4-AS-UU/S-dTdT

Structure #1 ENERGY = -75.1 \_

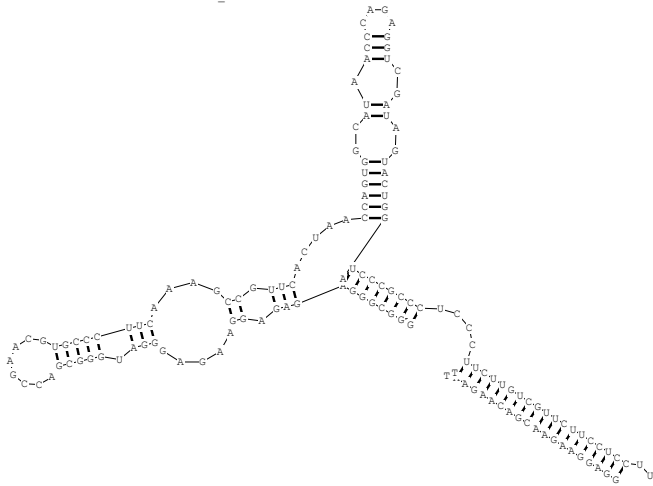

# 12-23-M-UCCC-si#4-S-BL/AS-dTdT

Structure #2 ENERGY = -74.5 \_

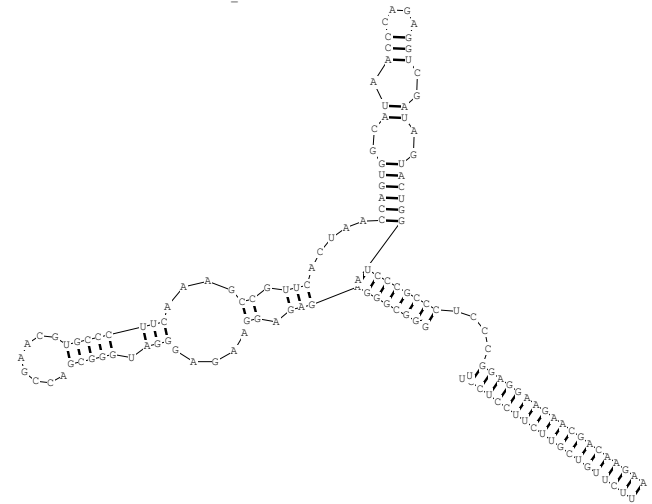



# 12-23-M-UCCC-si#6-AS-UU/S-dTdT

Structure #1 ENERGY = -71.0 \_

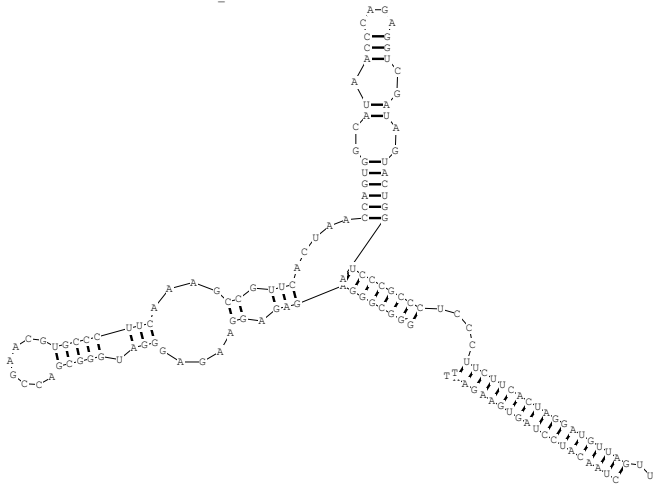

# 12-23-M-UCCC-si#6-S-BL/AS-dTdT

Structure #2 ENERGY = -70.6 \_

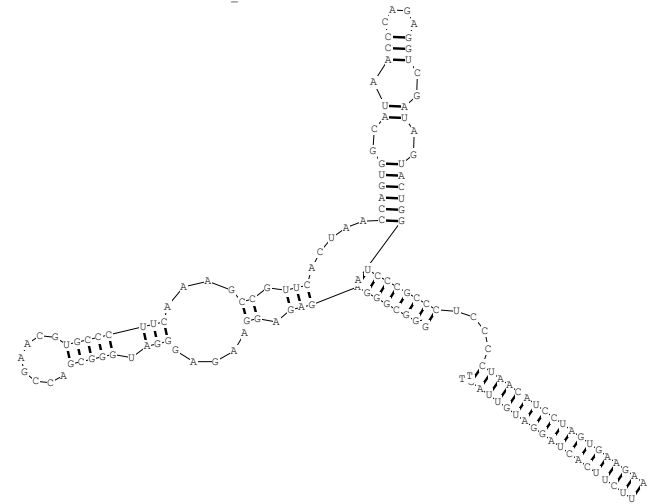

# 12-23-M-UCCC-si#7-AS-UU/S-dTdT

Structure #1 ENERGY = -75.4 \_

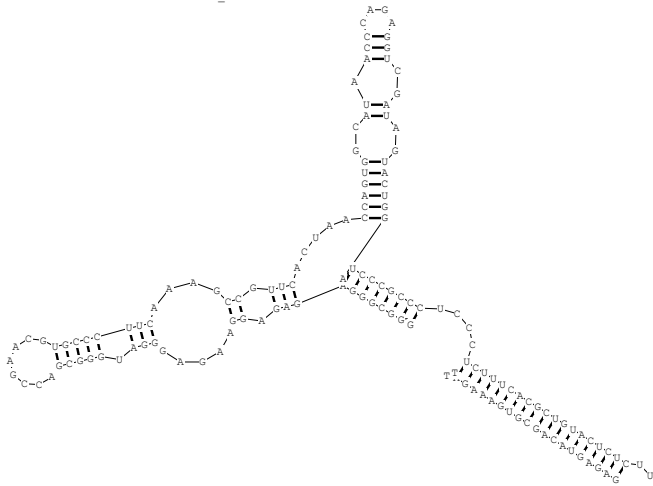

# 12-23-M-UCCC-si#7-S-BL/AS-dTdT

Structure #1 ENERGY = -74.8 \_

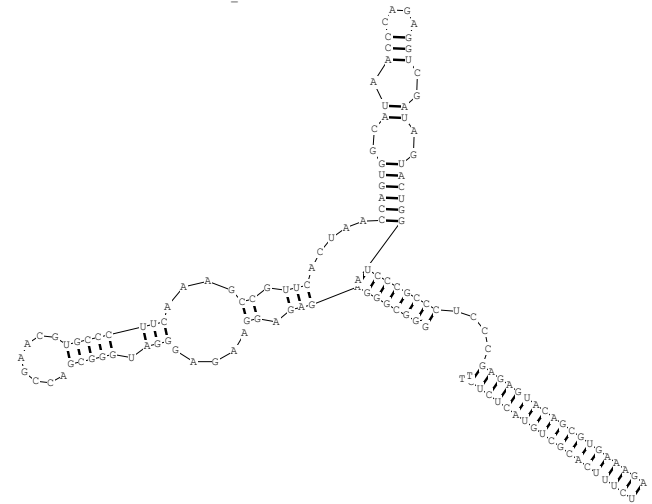



# 12-23-M-UCCC-si#8-AS-UU/S-dTdT

Structure #1 ENERGY = -77.2 \_

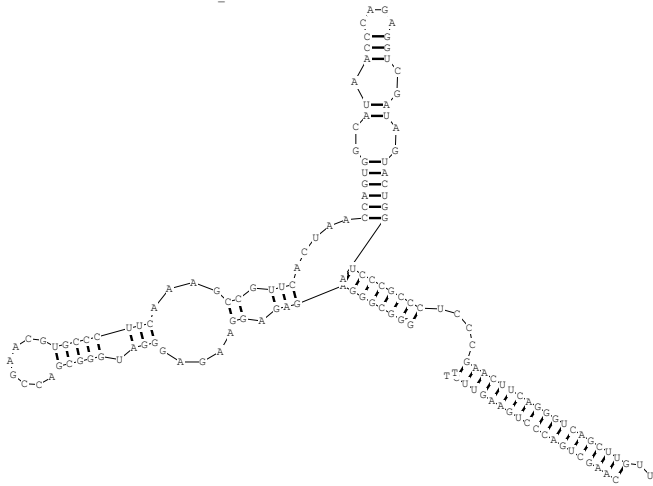

# 12-23-M-UCCC-si#8-S-BL/AS-dTdT

Structure #1 ENERGY = -76.2 \_

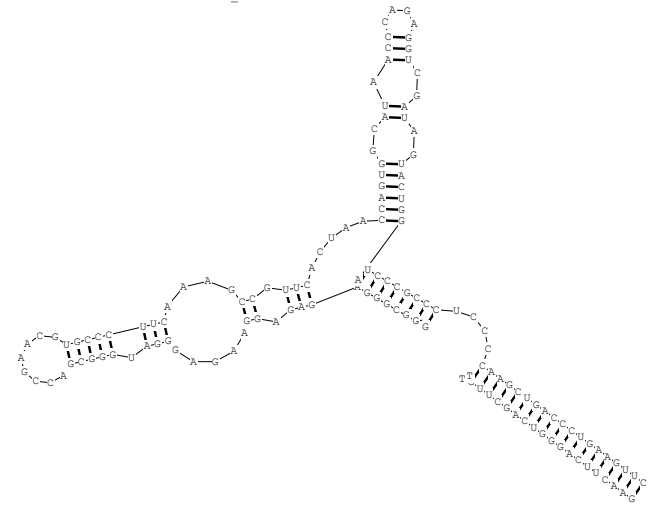

# 12-23-M-UCCC-si#9-AS-UU/S-dTdT

Structure #1 ENERGY = -78.5 \_

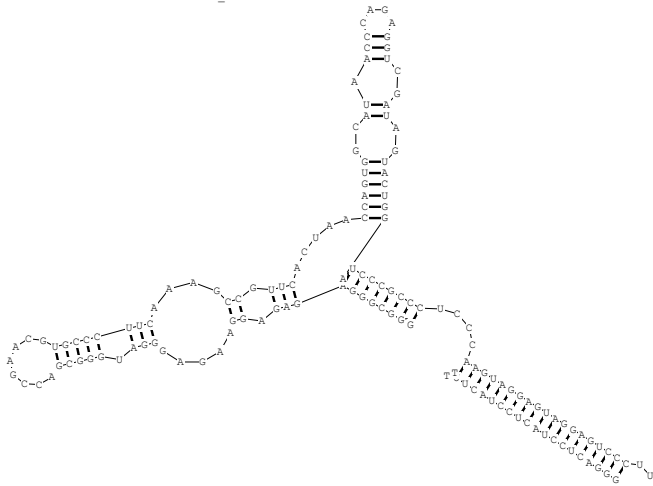

# 12-23-M-UCCC-si#9-S-BL/AS-dTdT

Structure #1 ENERGY = -78.1 \_

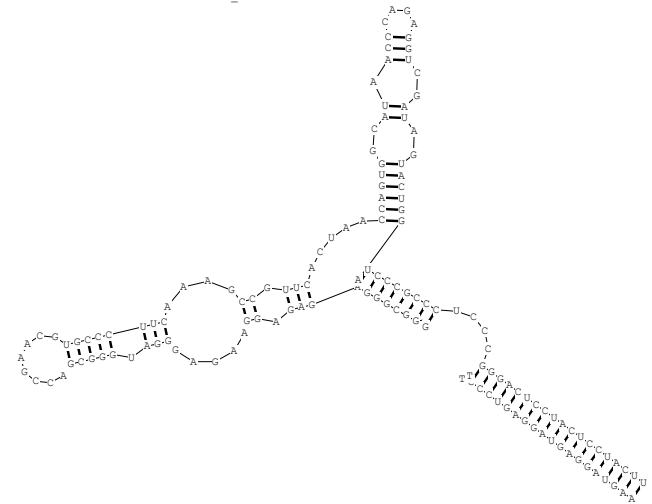

# 12-23-M-UCCC-si#10-AS-UU/S-dTdT

Structure #1 ENERGY = -78.7 \_

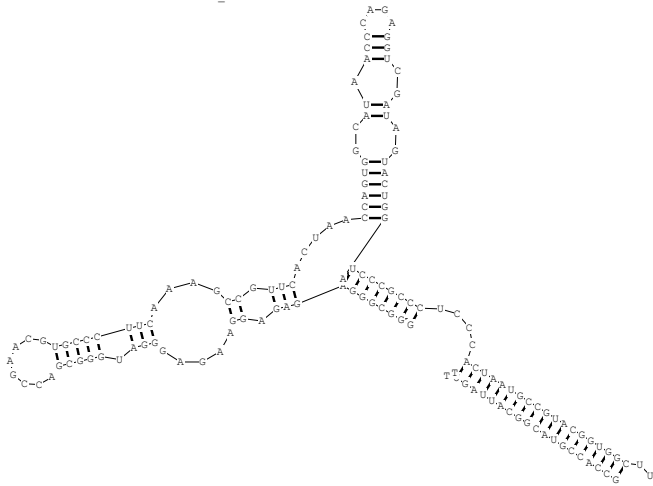

# 12-23-M-UCCC-si#10-S-BL/AS-dTdT

Structure #1 ENERGY = -78.3 \_

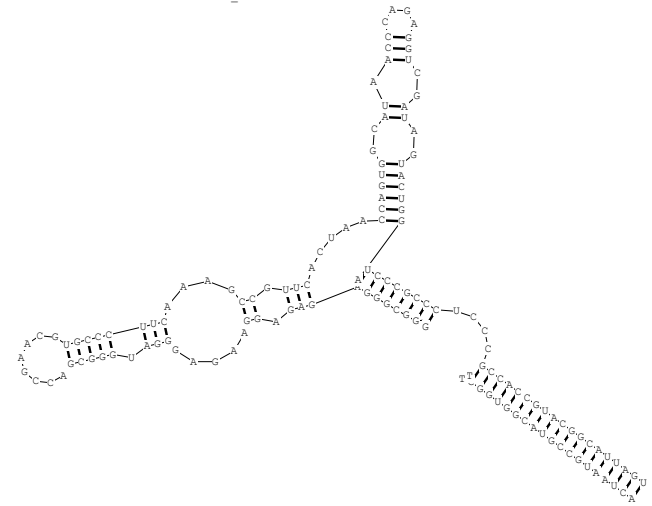

# 12-23-M-UCCC-si#11-AS-UU/S-dTdT

Structure #1 ENERGY = -78.2 \_

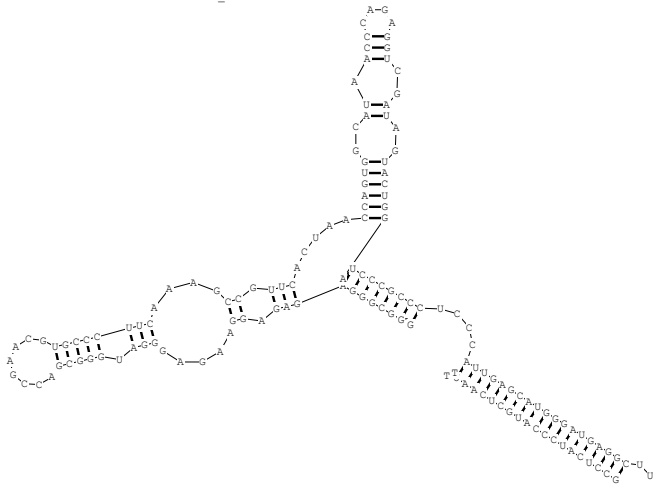

# 12-23-M-UCCC-si#11-S-BL/AS-dTdT

Structure #1 ENERGY = -77.8 \_

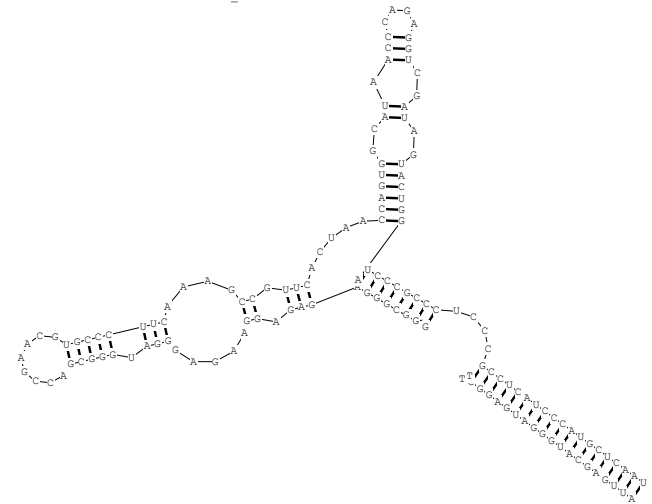

# 12-23-M-UCCC-si#12-AS-UU/S-dTdT

Structure #1 ENERGY = -79.7 \_

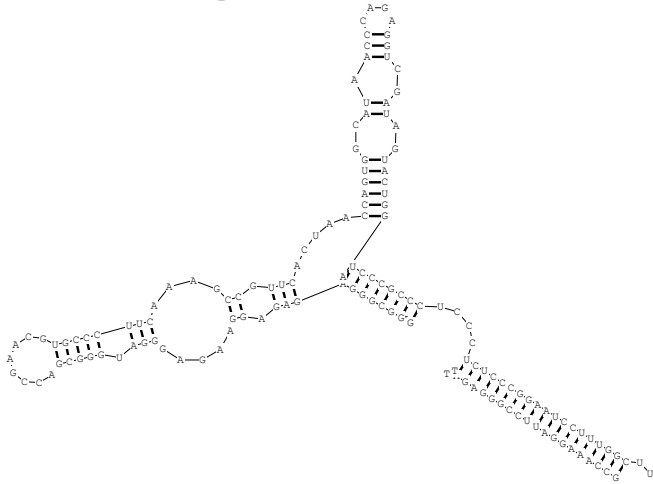

# 12-23-M-UCCC-si#12-S-BL/AS-dTdT

Structure #1 ENERGY = -79.1 \_

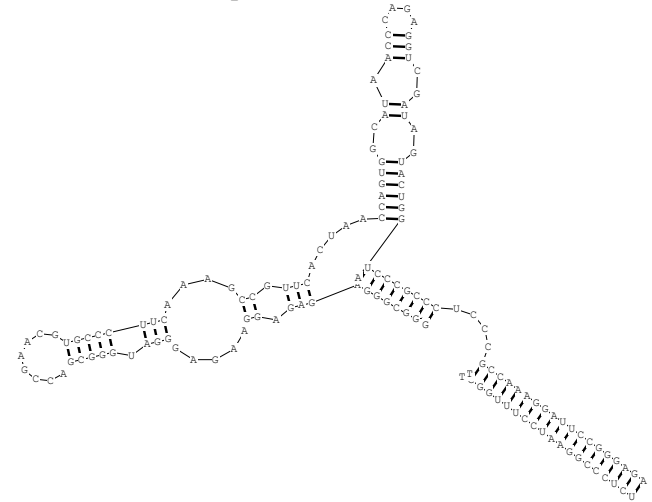

# 12-23-M-UCCC-si#13-AS-UU/S-dTdT

Structure #1 ENERGY = -73.8 \_

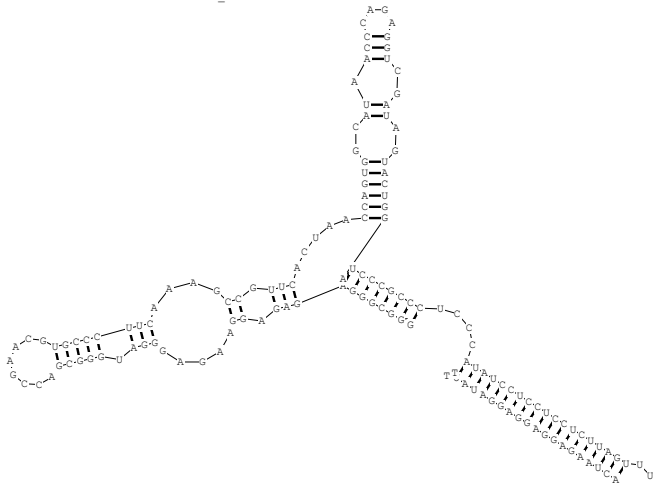

# 12-23-M-UCCC-si#13-S-BL/AS-dTdT

Structure #1 ENERGY = -73.7 \_

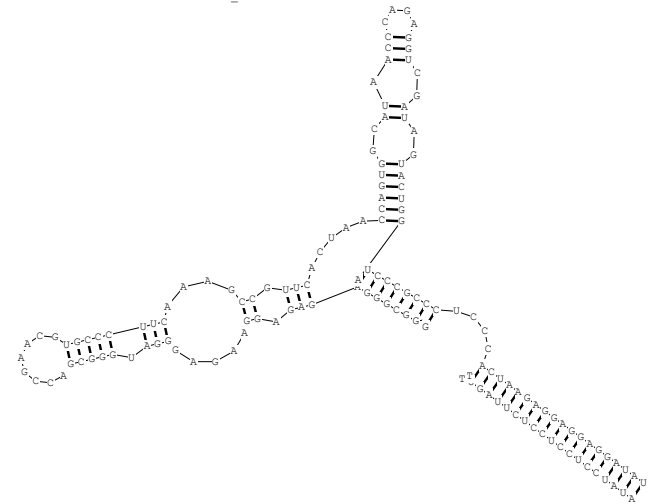

# 12-23-M-UCCC-si#14-AS-UU/S-dTdT

Structure #1 ENERGY = -75.7 \_

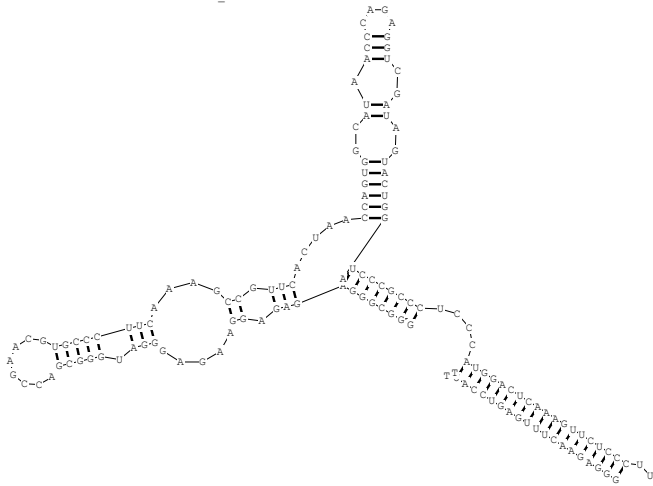

# 12-23-M-UCCC-si#14-S-BL/AS-dTdT

Structure #1 ENERGY = -75.3 \_

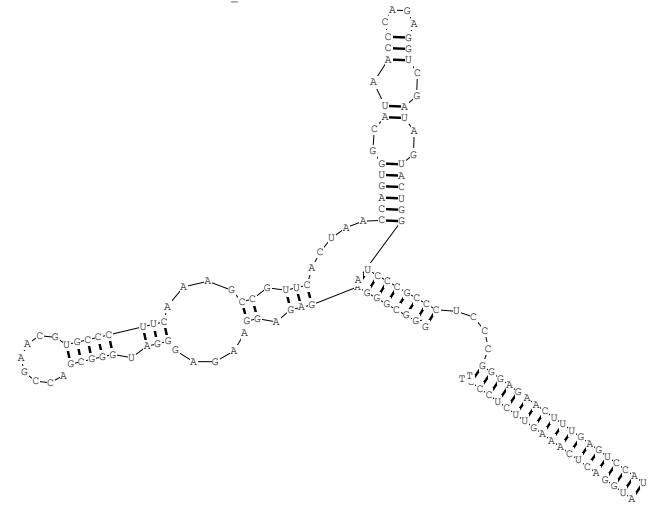

# 12-23-M-UCCC-si#15-AS-UU/S-dTdT

Structure #1 ENERGY = -75.6 \_

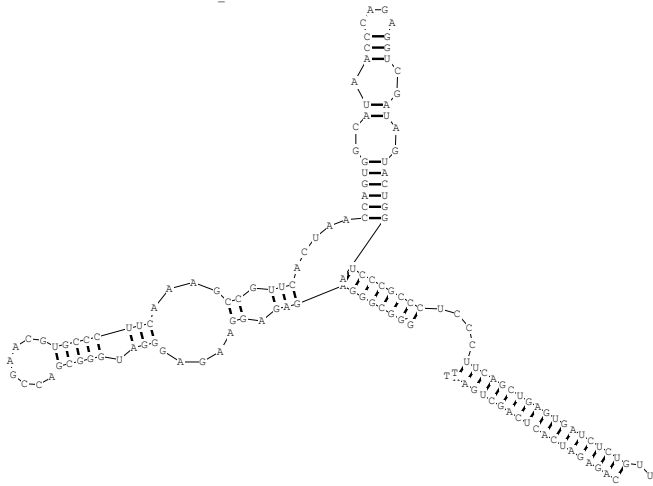

# 12-23-M-UCCC-si#15-S-BL/AS-dTdT

Structure #2 ENERGY = -75.2 \_

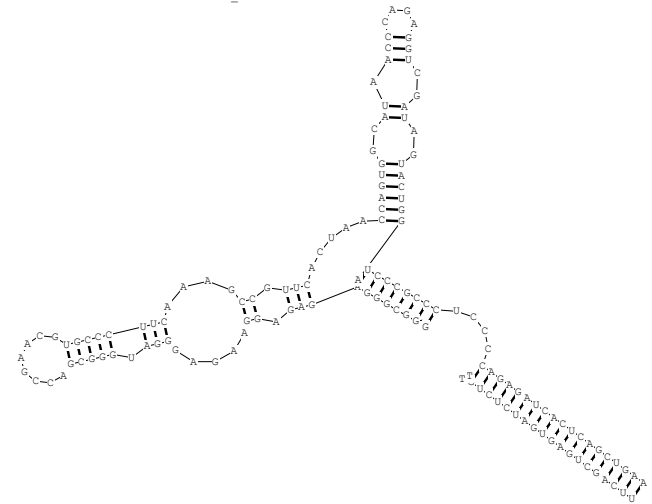



# 12-23-M-UCCC-si#16-AS-UU/S-dTdT

Structure #1 ENERGY = -69.6

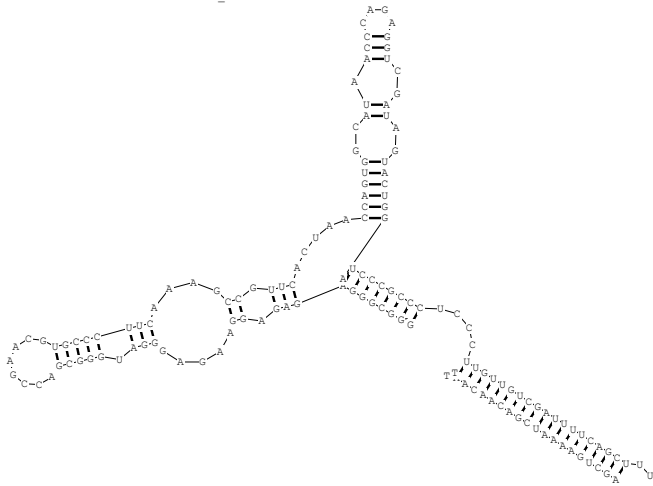

# 12-23-M-UCCC-si#16-S-BL/AS-dTdT

Structure #2 ENERGY = -69.3

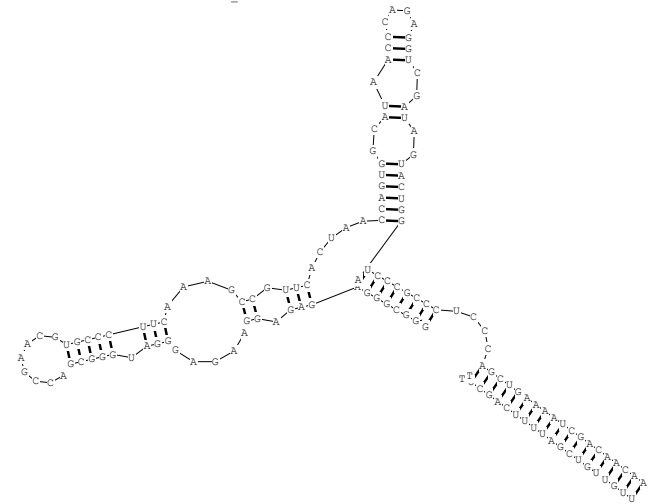

# 12-23-M-UCCC-si#17-AS-UU/S-dTdT

Structure #1 ENERGY = -73.7 \_

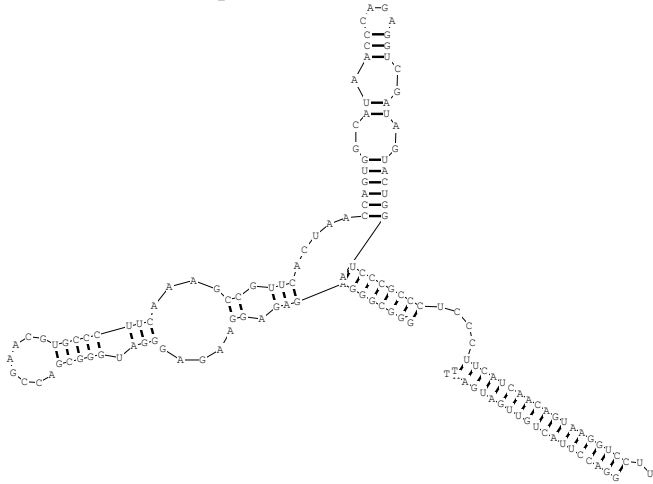

# 12-23-M-UCCC-si#17-S-BL/AS-dTdT

Structure #2 ENERGY = -73.1 \_

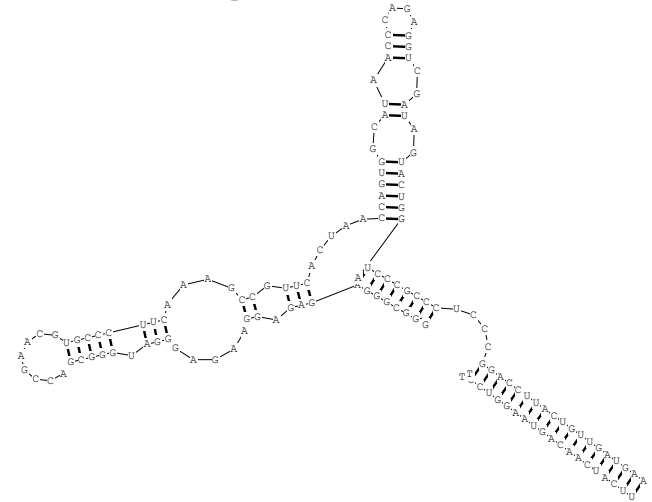

# 12-23-M-UCCC-si#18-AS-UU/S-dTdT

Structure #1 ENERGY = -68.0 \_

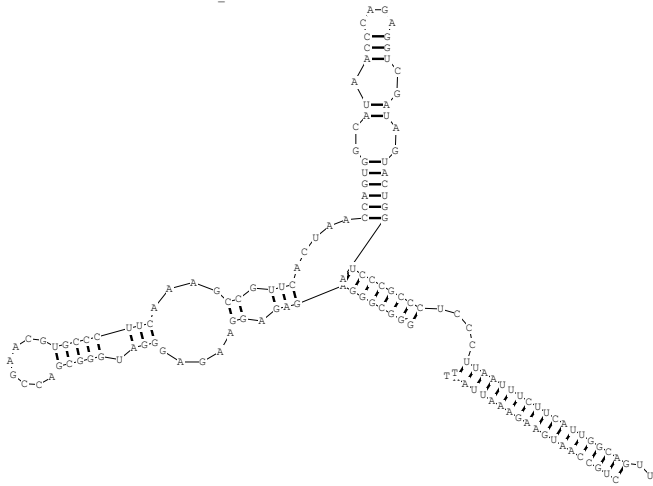

# 12-23-M-UCCC-si#18-S-BL/AS-dTdT

Structure #2 ENERGY = -67.6 \_

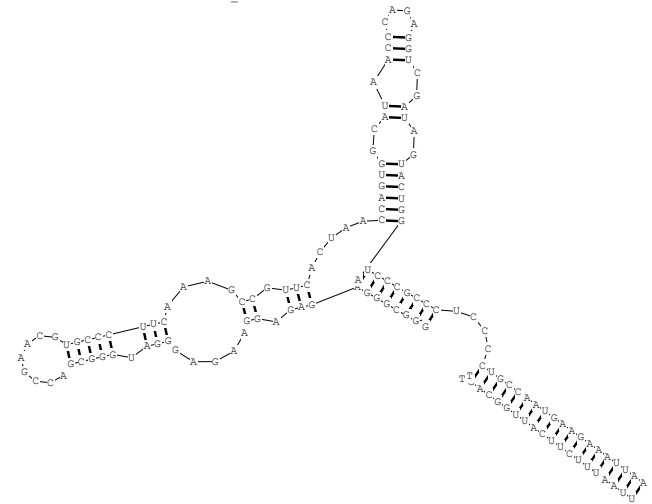

# 12-23-M-UCCC-si#19-AS-UU/S-dTdT

Structure #1 ENERGY = -69.7

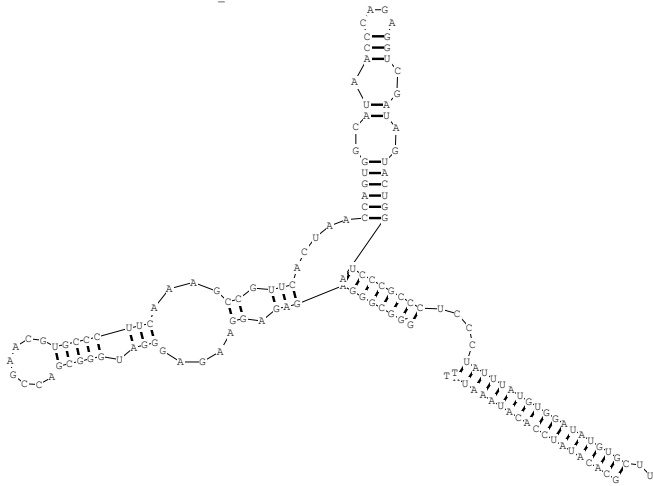

# 12-23-M-UCCC-si#19-S-BL/AS-dTdT

Structure #1 ENERGY = -69.1

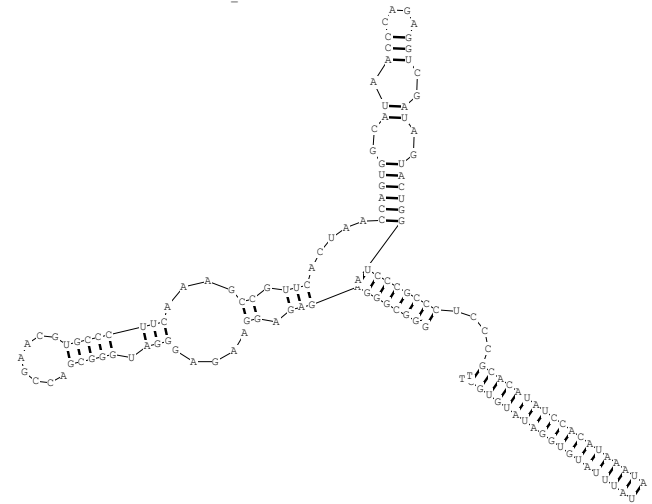

# 12-23-M-UCCC-si#20-AS-UU/S-dTdT

Structure #1 ENERGY = -73.1 \_

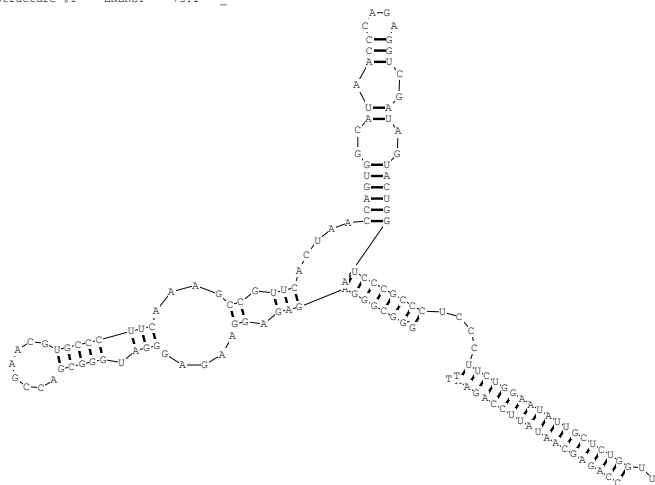

# 12-23-M-UCCC-si#20-S-BL/AS-dTdT

Structure #2 ENERGY = -72.7 \_

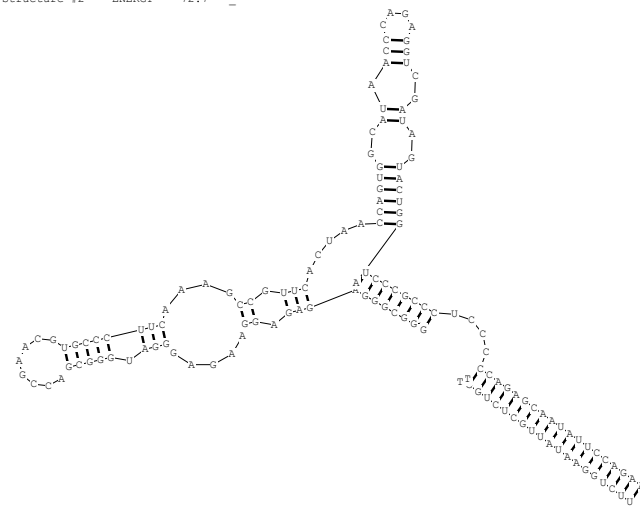

# 12-23-M-UCCC-si#21-AS-UU/S-dTdT

Structure #1 ENERGY = -73.8 \_

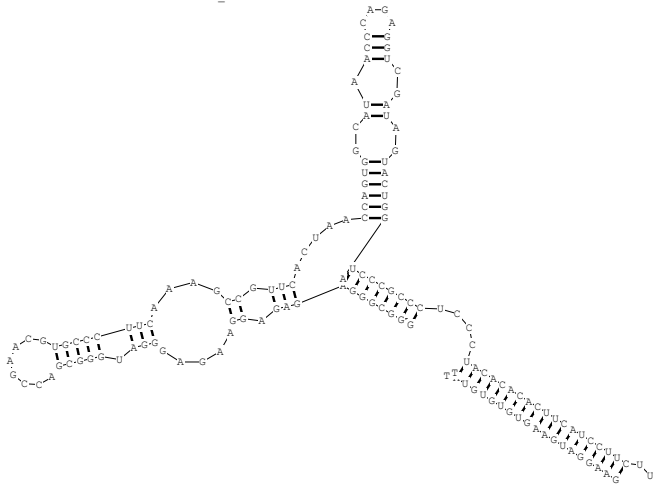

# 12-23-M-UCCC-si#21-S-BL/AS-dTdT

Structure #1 ENERGY = -73.2 \_

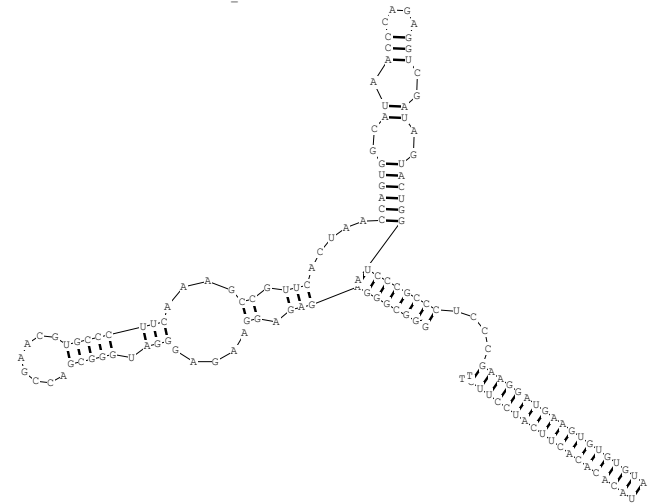

# 12-23-M-UCCC-si#22-AS-UU/S-dTdT

Structure #1 ENERGY = -73.7 \_

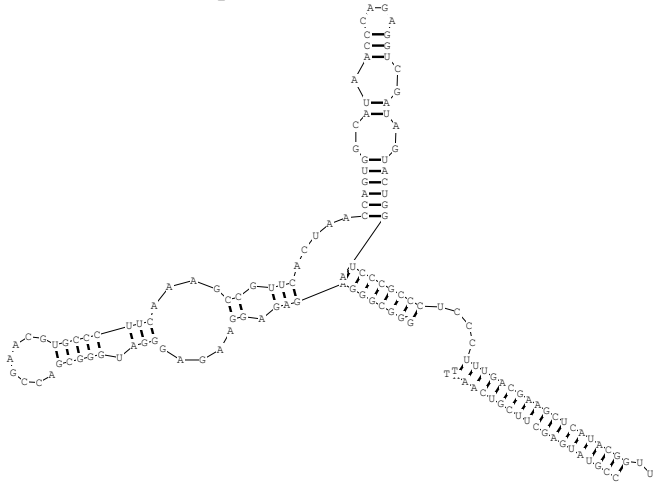

# 12-23-M-UCCC-si#22-S-BL/AS-dTdT

Structure #2 ENERGY = -73.3 \_

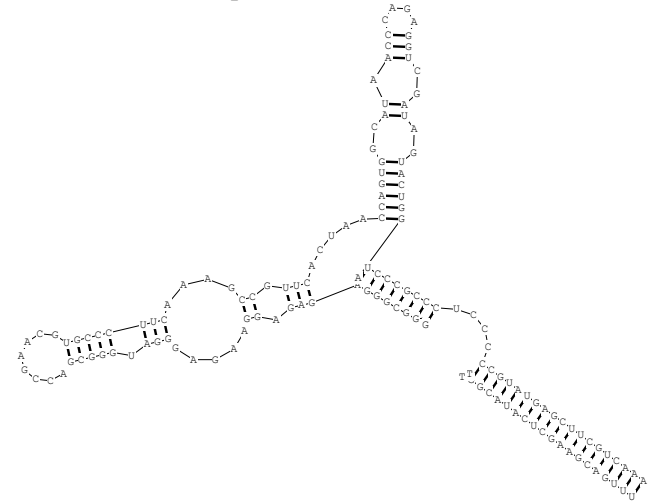





# 12-23-M-UCCC-si#24-AS-UU/S-dTdT

Structure #1 ENERGY = -75.5

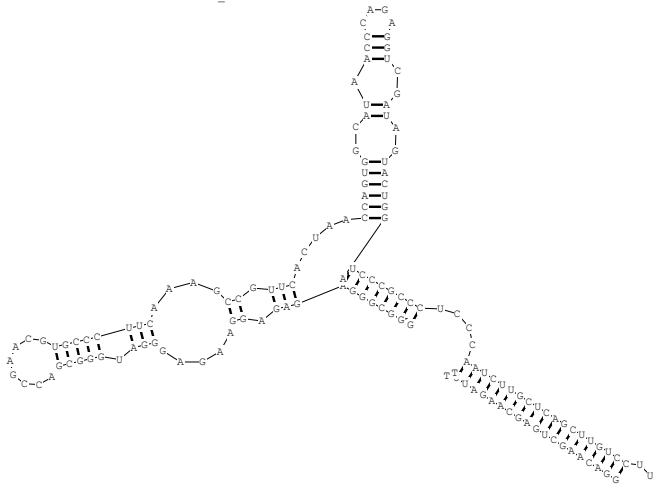

# 12-23-M-UCCC-si#24-S-BL/AS-dTdT

Structure #1 ENERGY = -75.1

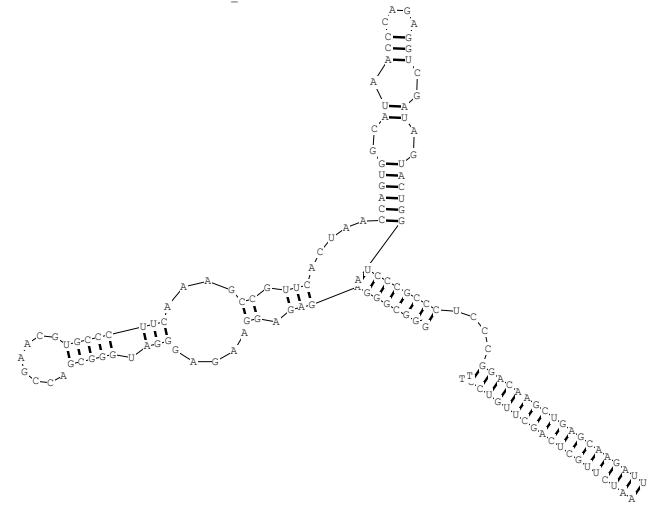

# OX40-si#25-AS-UU/S-dTdT

Structure #1 ENERGY = -56.3 \_

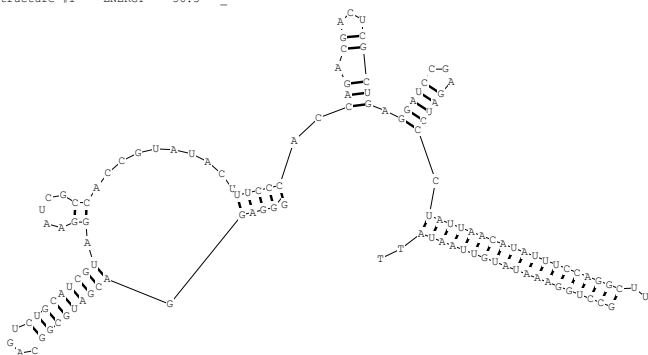

# OX40-si#25-S-BL/AS-dTdT

Structure #1 ENERGY = -55.7 \_

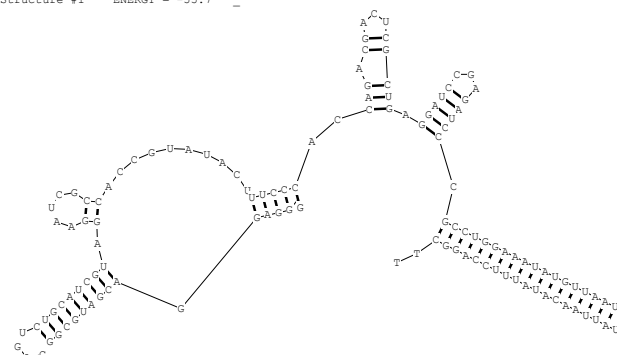

# 12-23-M-UCCC-si#26-AS-UU/S-dTdT

Structure #1 ENERGY = -81.6 \_

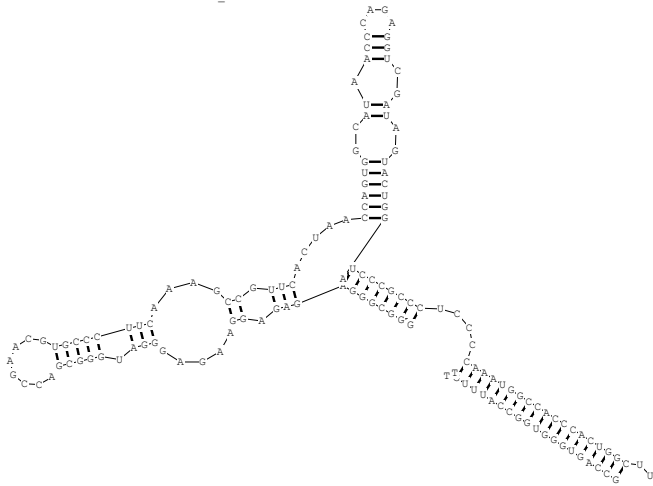

# 12-23-M-UCCC-si#26-S-BL/AS-dTdT

Structure #1 ENERGY = -80.8 \_

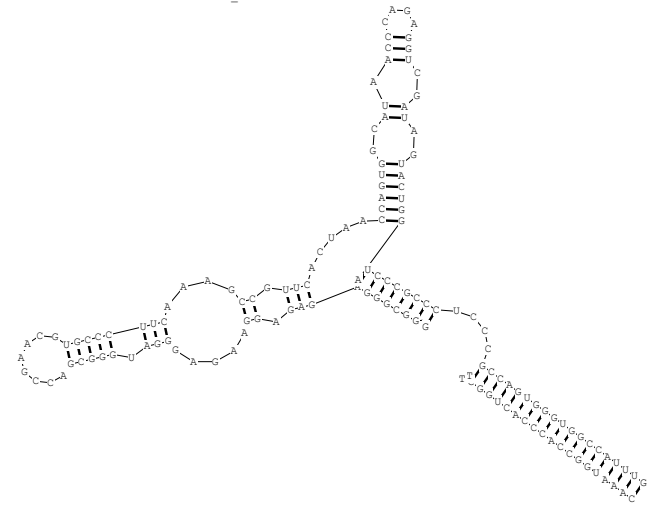

Supplement: mtna201241x1.pdf [file mtna201241x1.pdf]
